# Supplementary material for: Promoter methylation of the MGAT3 and BACH2 genes correlates with the composition of the immunoglobulin G glycome in inflammatory bowel disease
Source: PubMed Central journal article supplement (PMC5987481; doi:10.1186/s13148-018-0507-y), 2018-06-04
Supplement: 13148_2018_507_MOESM2_ESM.pdf [file 13148_2018_507_MOESM2_ESM.pdf]

## LAMB1

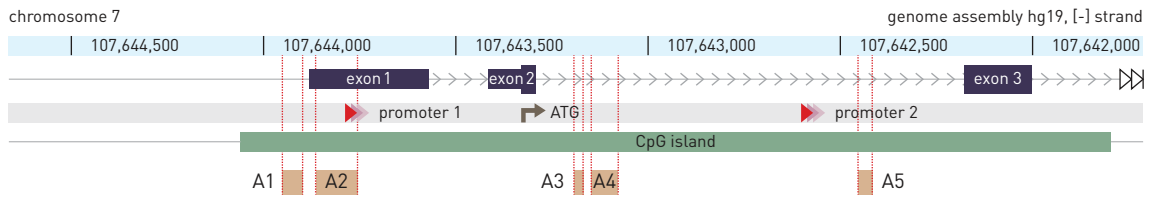

## IL6ST

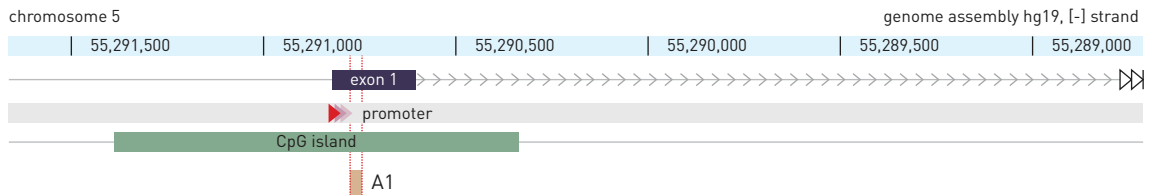

## IKZF1

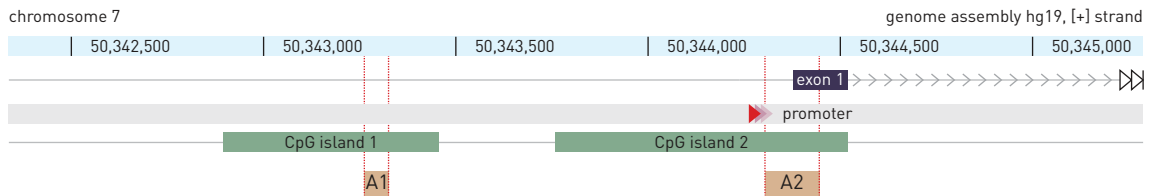

**Figure S1.** Position of the pyrosequencing assays for the genes *LAMB1*, *IL6ST* and *IKZF1* in the genome relative to CpG islands, annotated promoters and exons.
