# Supplementary material for: Promoter methylation of the MGAT3 and BACH2 genes correlates with the composition of the immunoglobulin G glycome in inflammatory bowel disease
Source: PubMed Central journal article supplement (PMC5987481; doi:10.1186/s13148-018-0507-y), 2018-06-04
Supplement: 13148_2018_507_MOESM3_ESM.pdf [file 13148_2018_507_MOESM3_ESM.pdf]

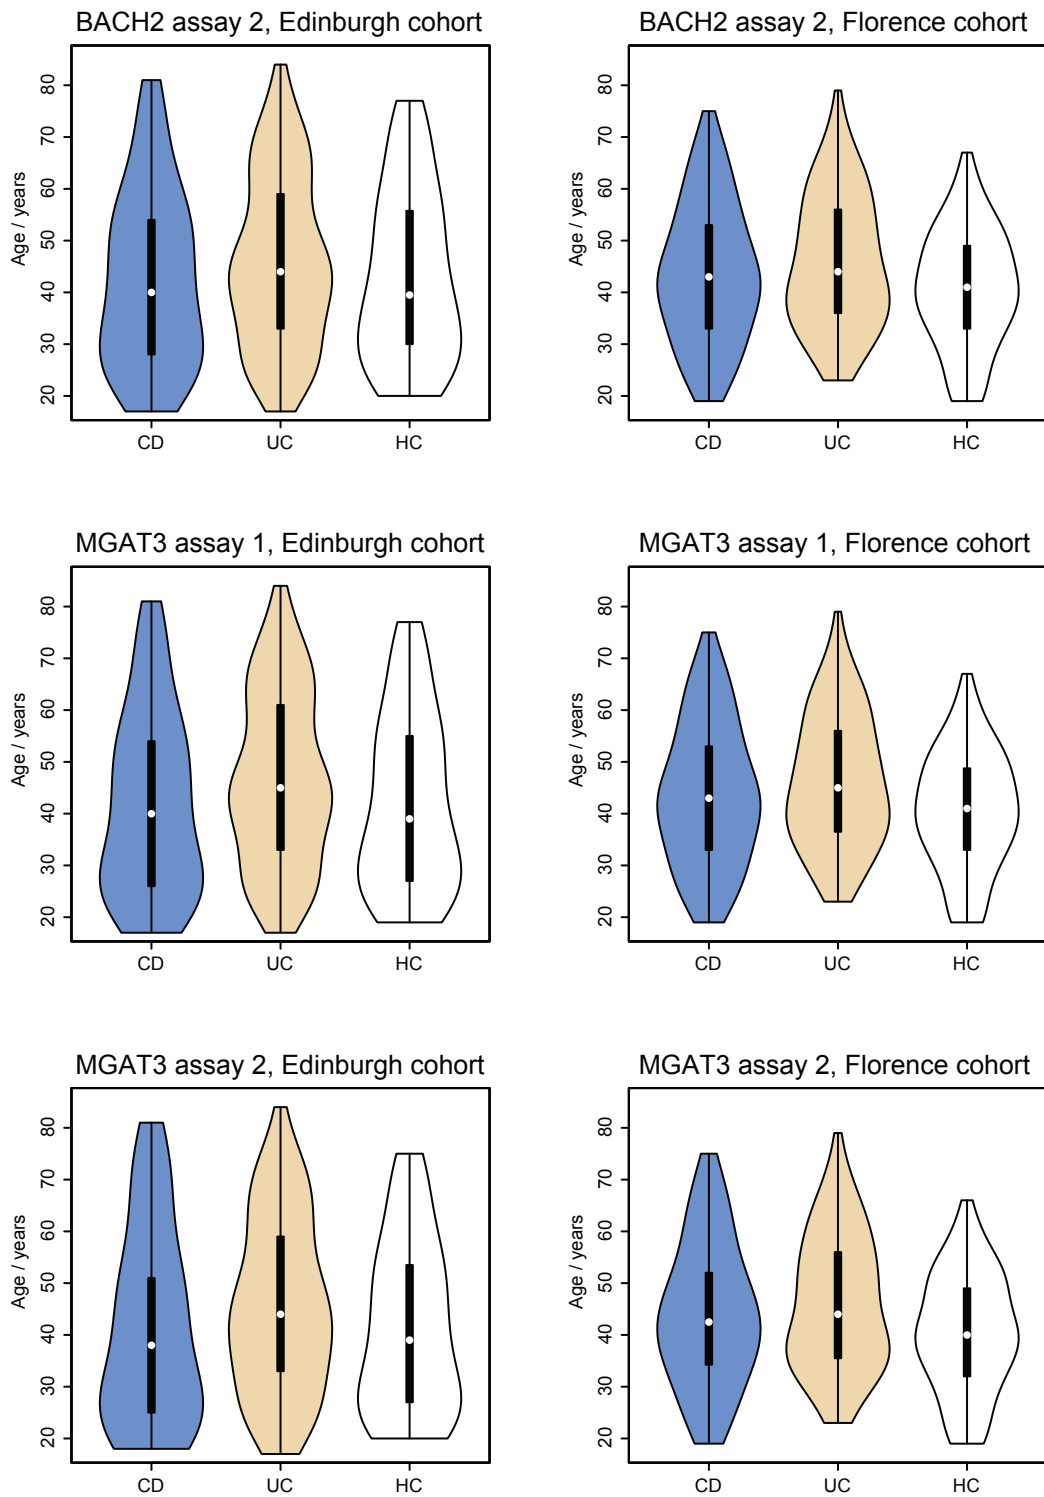

**Figure S2.** Violin plots showing the age distribution in IBD patients (CD, UC) and healthy controls (HC). The groups were well matched by age, which was shown by Mann-Whitney U test: no significant differences between groups were found at the level  $p = 0.05$ .
